# Supplementary material for: The Effect of Heat- and Salt Treatment on the Stability and Rheological Properties of Chickpea Protein-Stabilized Emulsions
Source: MDPI journal article supplement (doi:10.3390/app14072698), 2024-03-23
Supplement: s1 [file s1]

Archive with 1 entries (1 files):
- applsci-2880374-supplementary.pdf
