# Supplementary material for: The Effect of Heat- and Salt Treatment on the Stability and Rheological Properties of Chickpea Protein-Stabilized Emulsions
Source: MDPI journal article supplement (doi:10.3390/app14072698), 2024-03-23
Supplement: s1 [file s1 › applsci-2880374-supplementary.pdf]

# **THE EFFECT OF HEAT- AND SALT-TREATMENT ON THE STABILITY AND RHEOLOGICAL PROPERTIES OF CHICKPEA PROTEINS-STABILIZED EMULSIONS**

DIANA MAŃKO-JURKOWSKA<sup>a\*</sup> AND EWA DOMIAN<sup>b</sup>

*<sup>a</sup>Department of Chemistry, <sup>b</sup>Department of Food Engineering and Process Management,  
Institute of Food Sciences, Warsaw University of Life Sciences, 02-776 Warsaw, Poland*

Declarations of interest: none.

\*To whom correspondence should be addressed

phone (48-22) 593-76-14

fax (48-22) 593-76-35

e-mail [diana\\_manko-jurkowska@sggw.edu.pl](mailto:diana_manko-jurkowska@sggw.edu.pl)

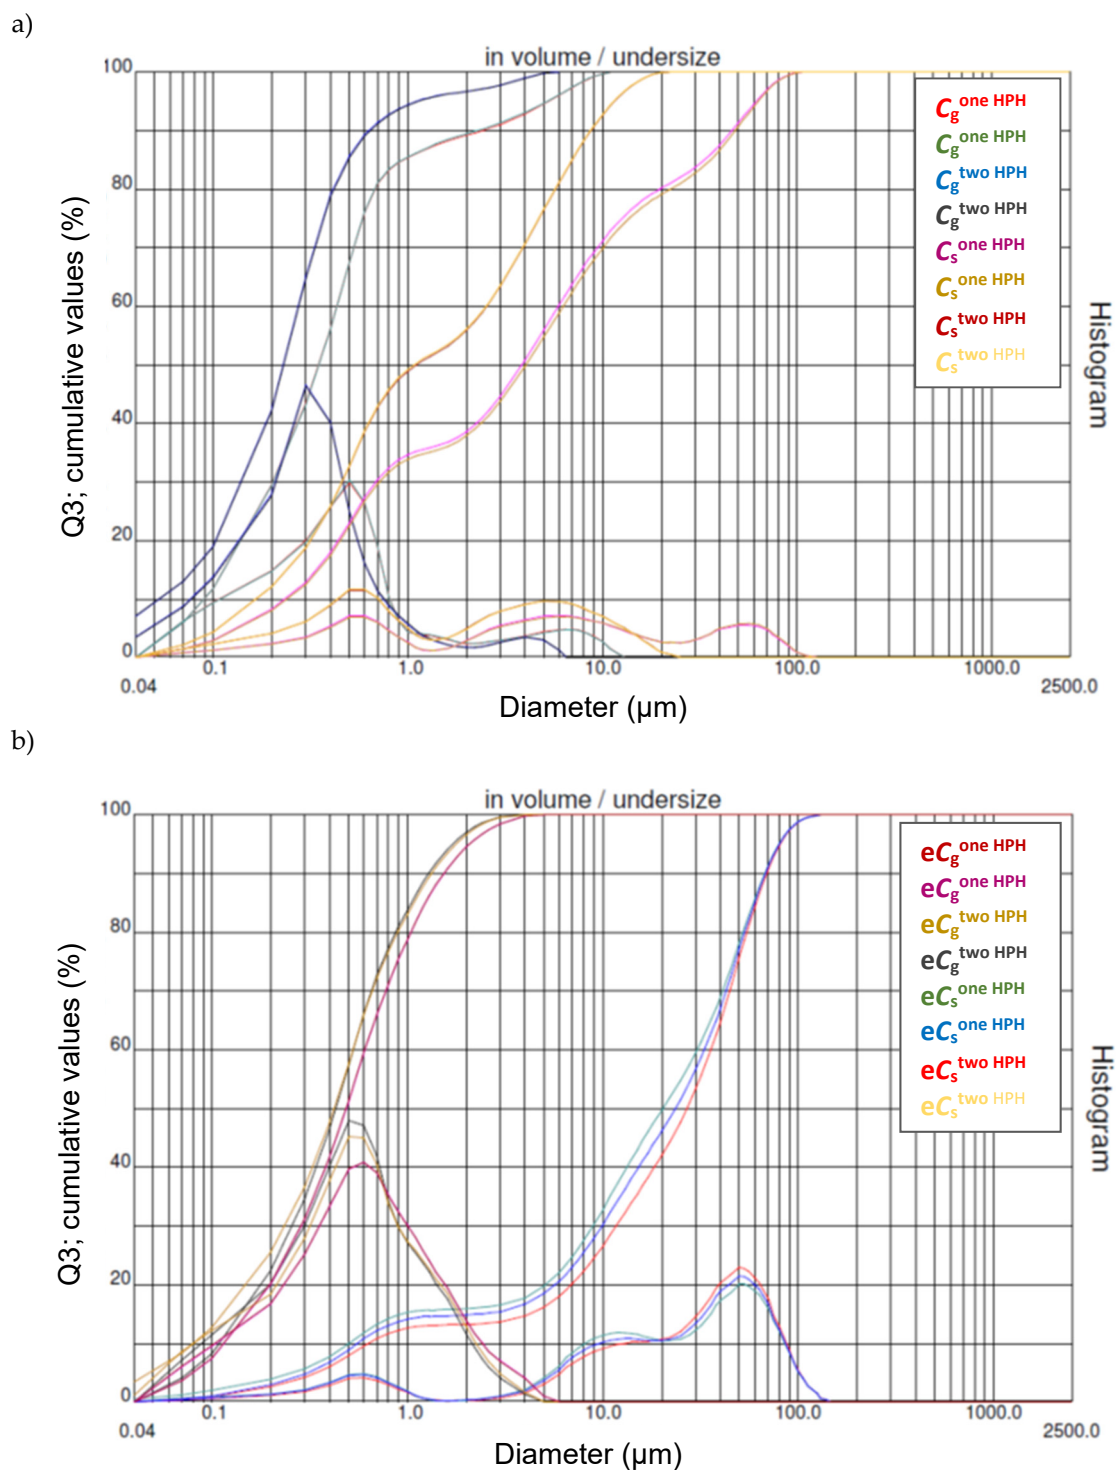

Figure S1. The PSD graphs (cumulative and histogram) for: CPC<sub>s</sub> and CPC<sub>g</sub> dispersions (C<sub>s</sub> and C<sub>g</sub>), pre-processed once (<sup>one</sup> HPH) or twice (<sup>two</sup> HPH) in high-pressure two stage homogenizer (a); and for corresponding emulsions, eC<sub>s</sub> and eC<sub>g</sub>, obtained from these dispersions (b).

a)

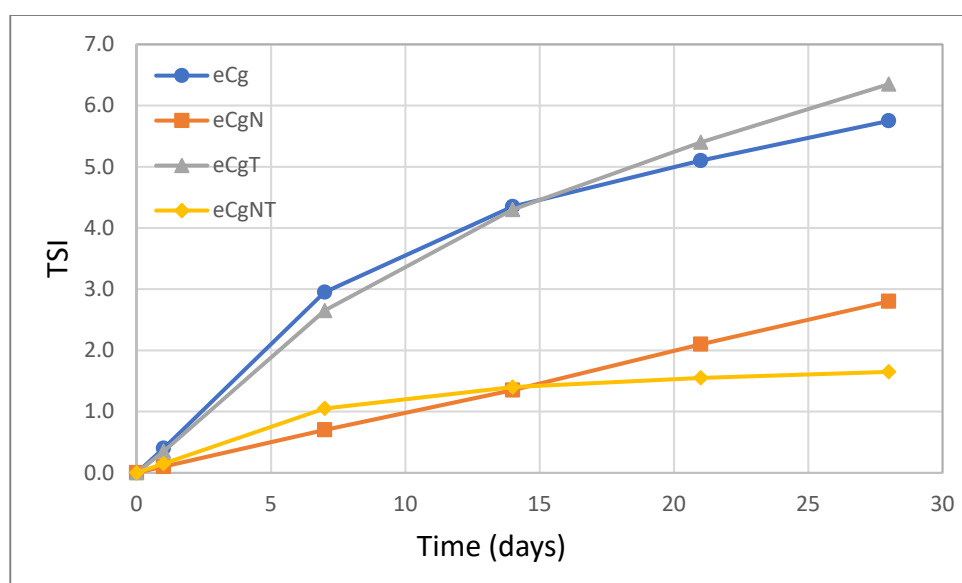

b)

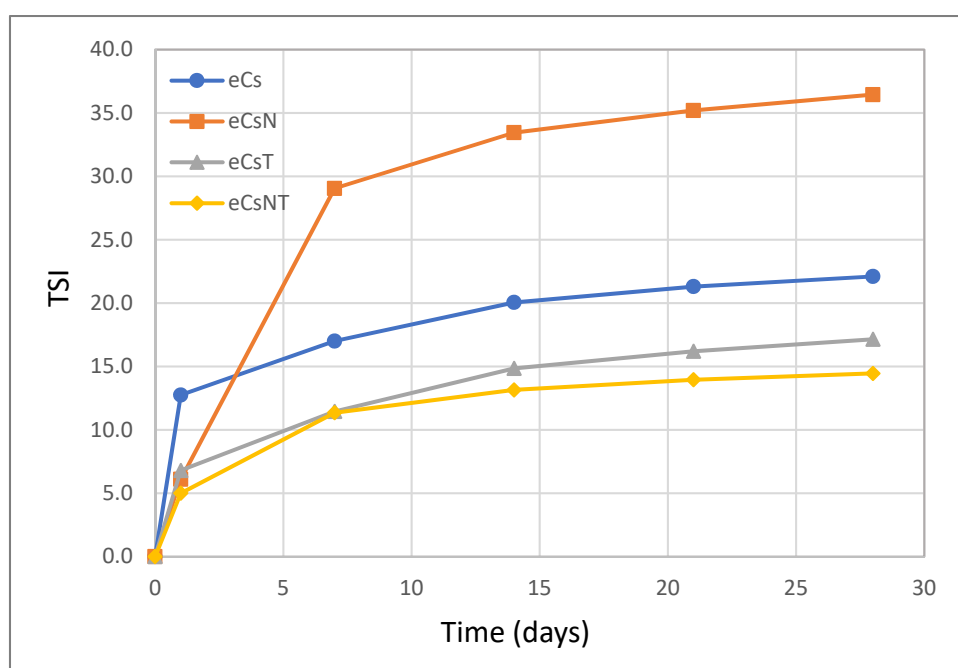

Figure S2. The Turbiscan Stability Index (TSI) kinetics of global destabilization for CPC<sub>g</sub>- and CPC<sub>s</sub>-stabilized emulsion (a and b, respectively), where: eC<sub>g</sub> and eC<sub>s</sub> – untreated samples; eC<sub>g</sub>N and eC<sub>s</sub>N – samples with 0.1M NaCl; eC<sub>g</sub>T and eC<sub>s</sub>T – sample heated to 95°C; eC<sub>g</sub>NT and eC<sub>s</sub>NT – samples with 0.1M NaCl heated to 95°C.

a)

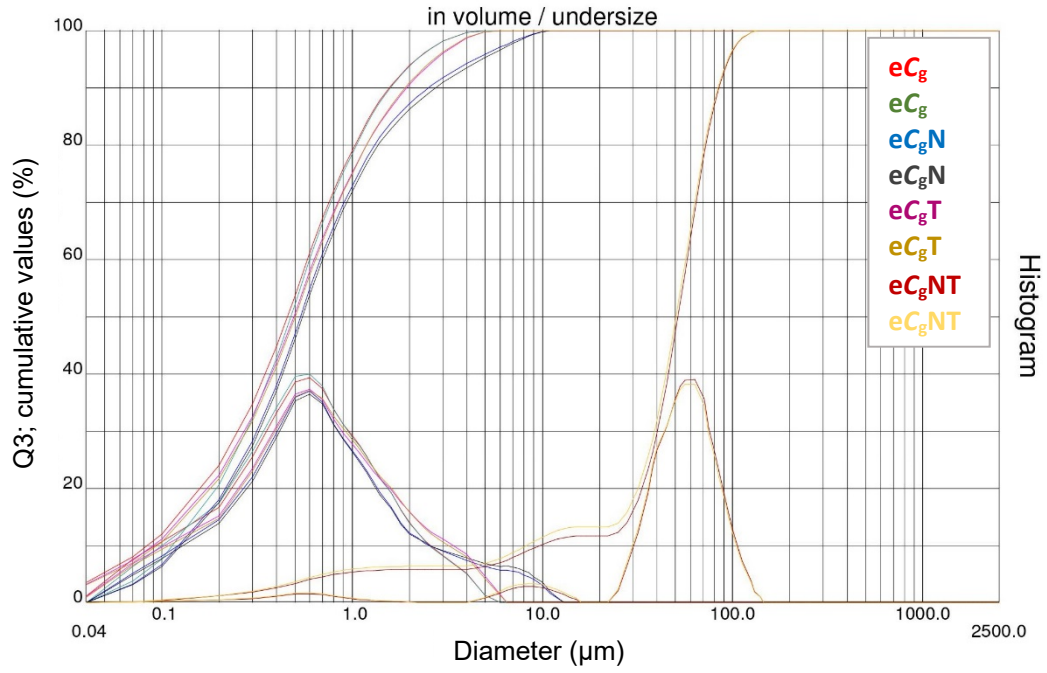

b)

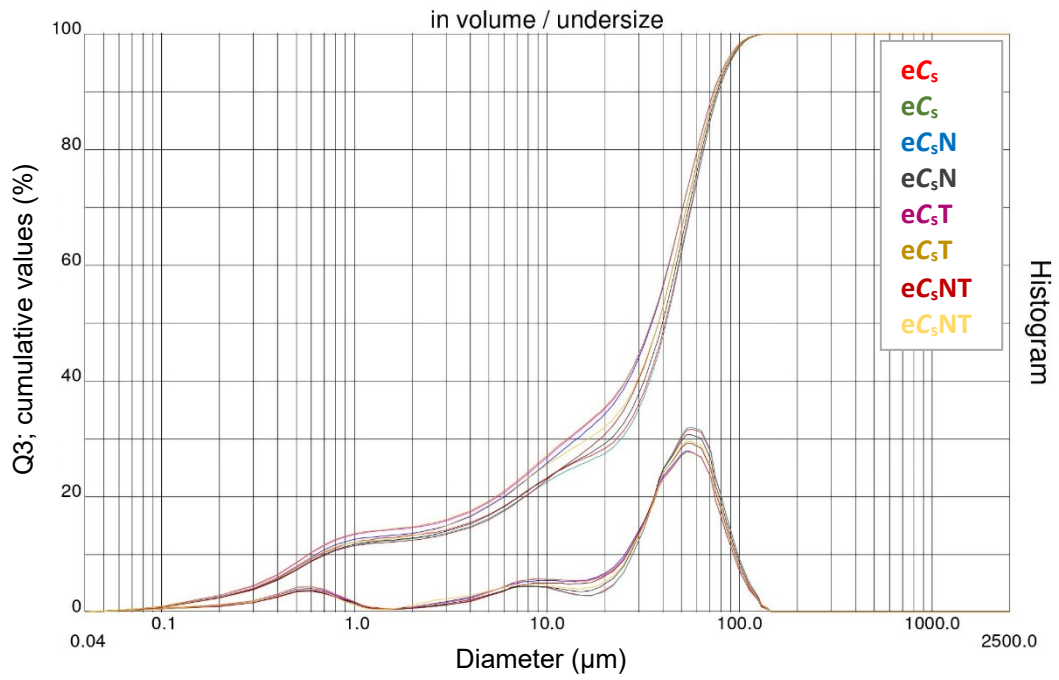

Figure S3. The PSD graphs (cumulative and histogram) for  $\text{CPC}_{\text{g}^-}$  and  $\text{CPC}_{\text{s}^-}$ -stabilized emulsions (a and b, respectively), where:  $\text{eC}_{\text{g}}$  and  $\text{eC}_{\text{s}}$  – untreated samples;  $\text{eC}_{\text{gN}}$  and  $\text{eC}_{\text{sN}}$  – samples with 0.1M NaCl;  $\text{eC}_{\text{gT}}$  and  $\text{eC}_{\text{sT}}$  – samples heated to 95°C;  $\text{eC}_{\text{gNT}}$  and  $\text{eC}_{\text{sNT}}$  – samples with 0.1M NaCl heated to 95°C.

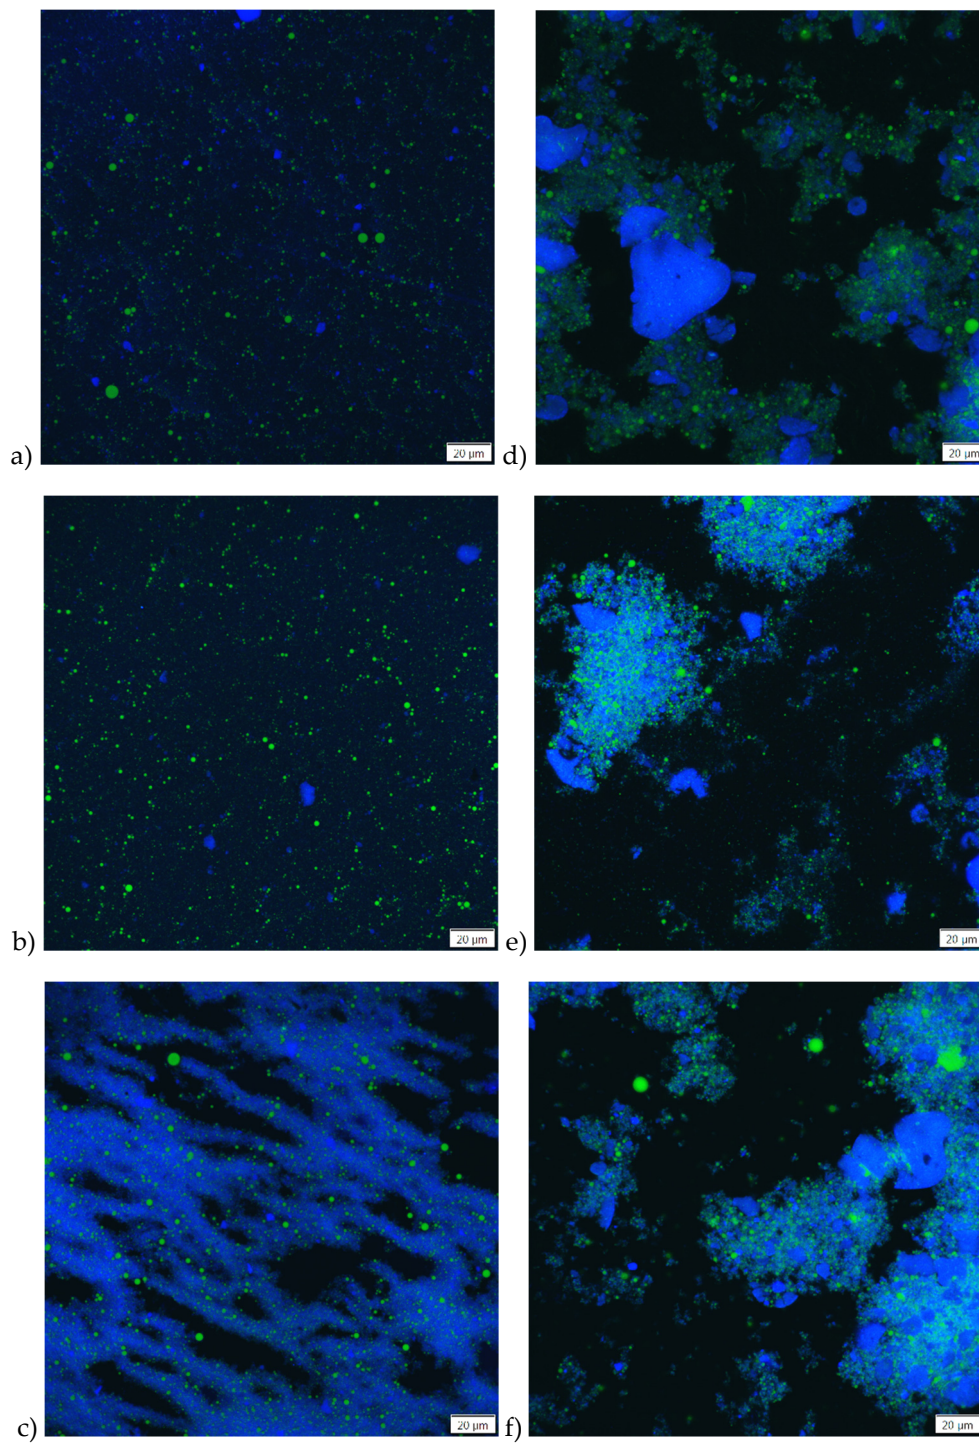

Figure S4. CLSM images of CPC<sub>g</sub>-stabilized emulsions (a-c) and CPC<sub>s</sub>-stabilized emulsions (d-f), where: a and d) untreated emulsions; b and e) emulsions heated to 95°C c and f) emulsions with 0.1M NaCl heated to 95°C. The green regions represent lipid and blue means the protein. The scale bar is 20 µm.

a)

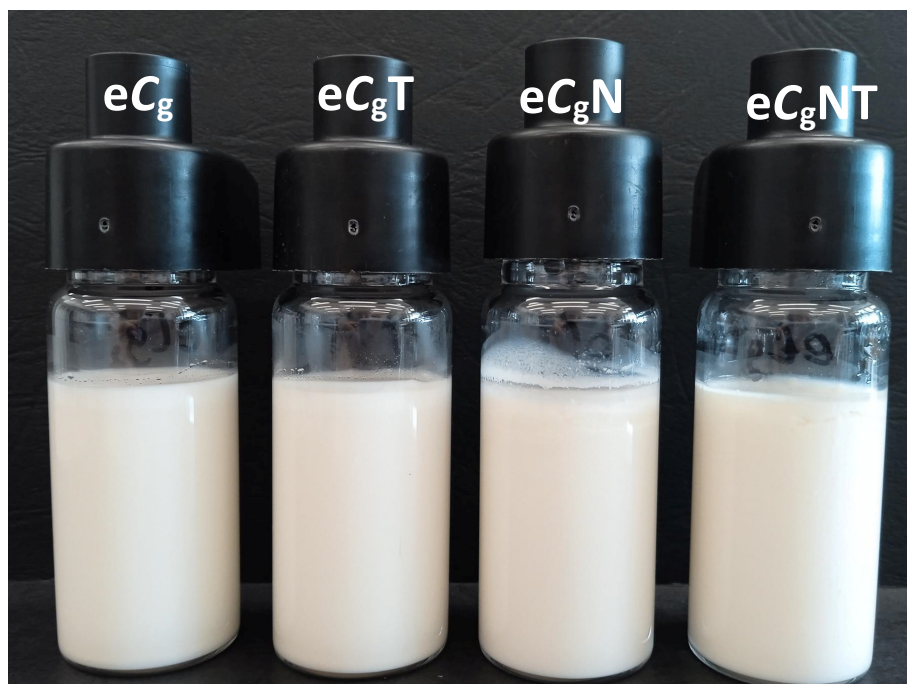

b)

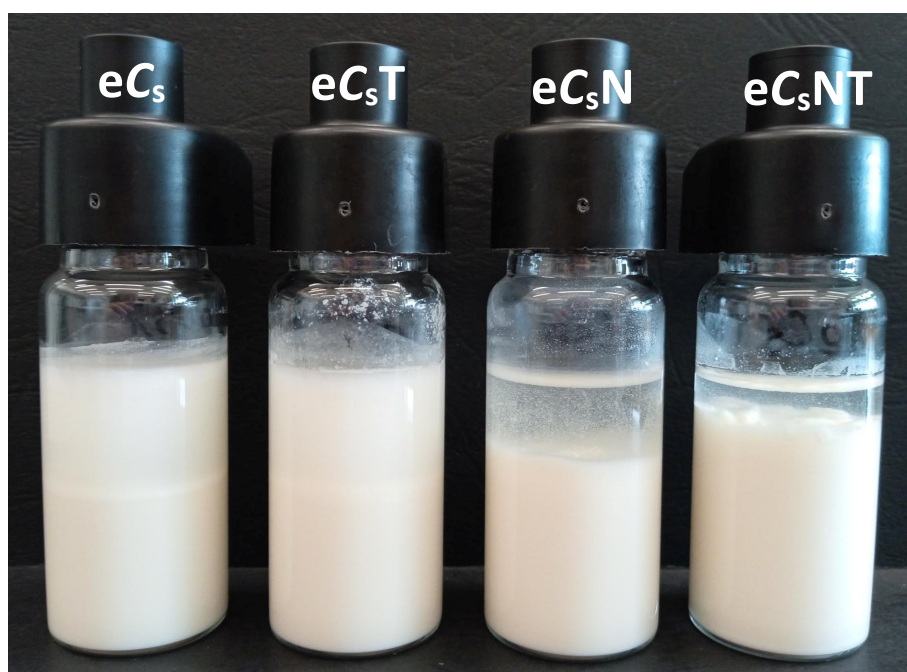

Figure S5. Photographs of  $CPC_g$ - and  $CPC_s$ -stabilized emulsion (a and b, respectively) after storage, where:  $eC_g$  and  $eC_s$  – untreated samples;  $eC_gN$  and  $eC_sN$  – samples with 0.1M NaCl;  $eC_gT$  and  $eC_sT$  – sample heated to 95°C;  $eC_gNT$  and  $eC_sNT$  – samples with 0.1M NaCl heated to 95°C. Emulsions are presented in Turbiscan glass cells.

a)

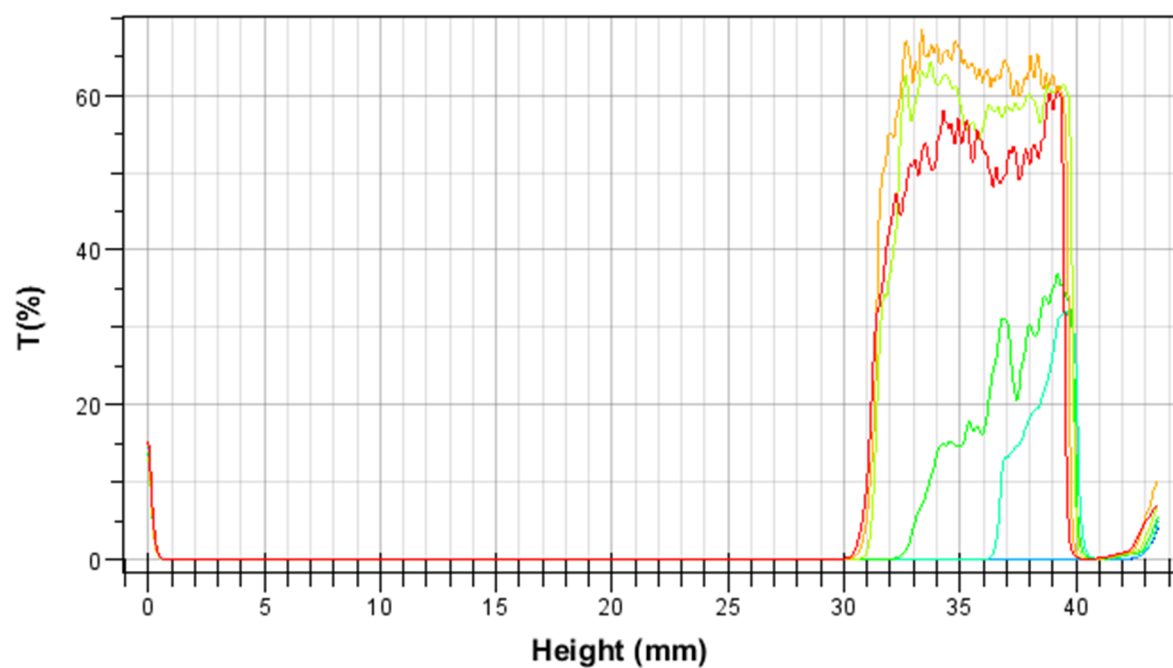

b)

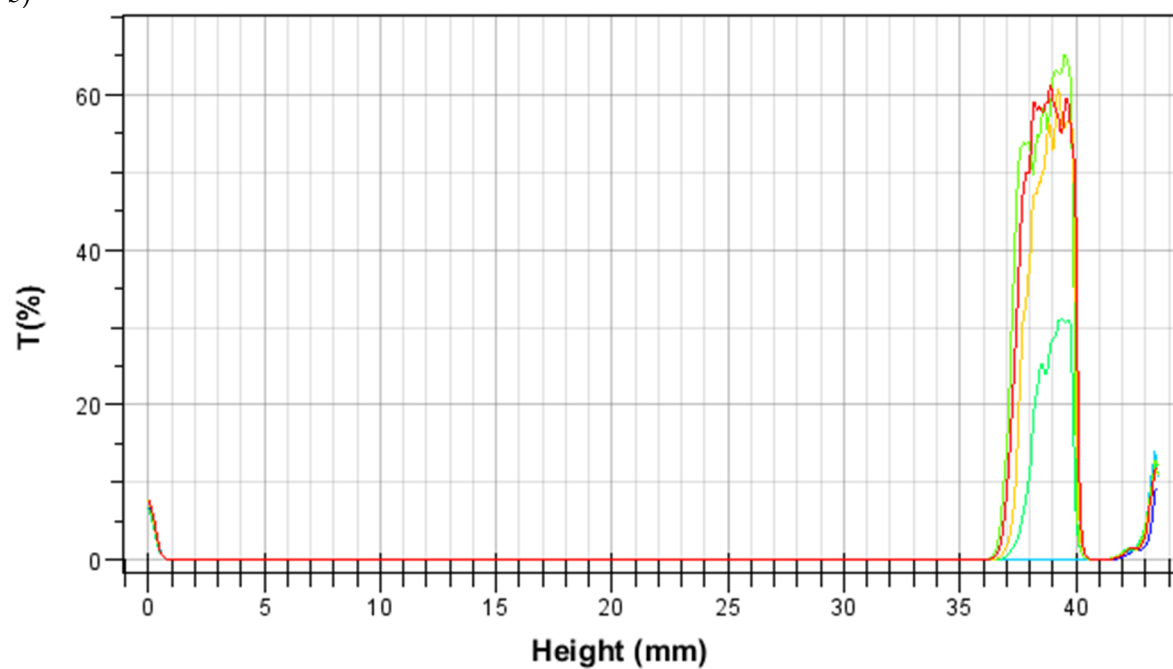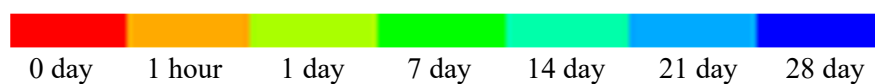

Figure S6. The transmission (%T) as a function of sample height for eCs during storage within 28 days: sample with 0.1M NaCl (a), sample with 0.1M NaCl heated to 95°C (b).

Table S1. The results of the volume PSD ( $d_{10}$ ,  $d_{50}$ ,  $d_{90}$  and span) for CPC<sub>g</sub> and CPC<sub>s</sub> dispersions after once and twice passing through the high-pressure homogenizer and for emulsions prepared from these dispersions. Table shows mean values and statistics ANOVA ( $\eta^2$  – coefficient indicating the extent of the effect of factors CPC and H).

| Sample <sup>1</sup>                | $d_{10}$ [ $\mu\text{m}$ ] | $d_{50}$ [ $\mu\text{m}$ ] | $d_{90}$ [ $\mu\text{m}$ ] | span [-]           |
|------------------------------------|----------------------------|----------------------------|----------------------------|--------------------|
| C <sub>g</sub> <sup>one</sup> HPH  | 0.09 <sup>b</sup>          | 0.35 <sup>a</sup>          | 2.36 <sup>a</sup>          | 6.51 <sup>b</sup>  |
| C <sub>g</sub> <sup>two</sup> HPH  | 0.05 <sup>a</sup>          | 0.23 <sup>a</sup>          | 0.64 <sup>a</sup>          | 2.56 <sup>a</sup>  |
| C <sub>s</sub> <sup>one</sup> HPH  | 0.24 <sup>d</sup>          | 3.96 <sup>c</sup>          | 47.19 <sup>c</sup>         | 11.87 <sup>d</sup> |
| C <sub>s</sub> <sup>two</sup> HPH  | 0.17 <sup>c</sup>          | 1.10 <sup>b</sup>          | 8.72 <sup>b</sup>          | 7.82 <sup>c</sup>  |
| Statistics ANOVA, $\eta^2$ [-]     |                            |                            |                            |                    |
| CPC                                | 0.999                      | 0.998                      | 0.999                      | 0.998              |
| H                                  | 0.997                      | 0.995                      | 0.998                      | 0.997              |
| CPC*H                              | 0.967                      | 0.995                      | 0.997                      | ns                 |
| eC <sub>g</sub> <sup>one</sup> HPH | 0.10 <sup>a</sup>          | 0.45 <sup>a</sup>          | 1.44 <sup>a</sup>          | 2.96 <sup>a</sup>  |
| eC <sub>g</sub> <sup>two</sup> HPH | 0.11 <sup>a</sup>          | 0.46 <sup>a</sup>          | 1.42 <sup>a</sup>          | 2.85 <sup>a</sup>  |
| eC <sub>s</sub> <sup>one</sup> HPH | 0.53 <sup>b</sup>          | 21.92 <sup>b</sup>         | 67.76 <sup>b</sup>         | 3.08 <sup>a</sup>  |
| eC <sub>s</sub> <sup>two</sup> HPH | 0.64 <sup>b</sup>          | 27.08 <sup>b</sup>         | 69.05 <sup>b</sup>         | 2.53 <sup>a</sup>  |
| Statistics ANOVA, $\eta^2$ [-]     |                            |                            |                            |                    |
| CPC                                | 0.943                      | 0.921                      | 0.999                      | ns                 |
| H                                  | ns                         | ns                         | ns                         | ns                 |
| CPC*H                              | ns                         | ns                         | ns                         | ns                 |

a, b, c, d – mean values in columns denoted by different letters differ significantly ( $p \leq 0.05$ )

ANOVA factors: CPC – type of CPC (CPC<sub>g</sub> or CPC<sub>s</sub>), H – homogenization (one pass or two passes through high-pressure homogenizer)

<sup>1</sup>C<sub>s</sub> and C<sub>g</sub> – CPC<sub>s</sub> and CPC<sub>g</sub> dispersions; eC<sub>s</sub> and eC<sub>g</sub> – CPC<sub>s</sub>- and CPC<sub>g</sub>-stabilized emulsions; <sup>one</sup> HPH and <sup>two</sup> HPH – one pass or two passes of the sample through the HP homogenizer

Table S2. The calculated values of viscosity and rheological model parameters derived from fitting the shear curve according to the Newton, Ostwald-de Waele or Herschel-Bulkley model of the flow behavior for the CPC<sub>g</sub> and CPC<sub>s</sub> dispersions. Table shows mean values and standard deviations (SD) range, and statistics ANOVA.

| Sample <sup>1</sup> | $\mu$ 100 <sup>§</sup><br>[mPa·s] | VRI <sup>†</sup><br>[-]      | Model <sup>‡</sup><br>( $r \geq 0,999$ ) | $\mu$<br>[mPa·s] | $k$<br>[mPa·s <sup><math>n</math></sup> ] | $n$<br>[-]      | $\tau_0$<br>[mPa] |
|---------------------|-----------------------------------|------------------------------|------------------------------------------|------------------|-------------------------------------------|-----------------|-------------------|
| C <sub>g</sub>      | 2.51<br>±0.00 <sup>abc</sup>      | 0<br><sup>a</sup>            | Newton                                   | 2.51<br>±0.00    |                                           | 1               |                   |
| C <sub>g</sub> N    | 2.73<br>±0.01 <sup>abc</sup>      | 0.080<br>±0.004 <sup>a</sup> | Ostwald-de Waele                         |                  | 3.22<br>±0.02                             | 0.964<br>±0.002 |                   |
| C <sub>g</sub> T    | 2.83<br>±0.02 <sup>abc</sup>      | 0<br><sup>a</sup>            | Newton                                   | 2.83<br>±0.02    |                                           | 1               |                   |
| C <sub>g</sub> TN   | 19.18<br>±0.61 <sup>f</sup>       | 0.655<br>±0.006 <sup>d</sup> | Herschel-Bulkley                         |                  | 108<br>±5                                 | 0.612<br>±0.005 | 115<br>±11        |
| C <sub>s</sub>      | 1.66<br>±0.01 <sup>a</sup>        | 0<br><sup>a</sup>            | Newton                                   | 1.66<br>±0.01    |                                           | 1               |                   |
| C <sub>s</sub> N    | 1.94<br>±0.06 <sup>ab</sup>       | 0.069<br>±0.019 <sup>a</sup> | Ostwald-de Waele                         |                  | 2.24<br>±0.02                             | 0.969<br>±0.009 |                   |
| C <sub>s</sub> T    | 2.39<br>±0.00 <sup>abc</sup>      | 0.069<br>±0.009 <sup>a</sup> | Ostwald-de Waele                         |                  | 2.76<br>±0.05                             | 0.969<br>±0.004 |                   |
| C <sub>s</sub> TN   | 3.09<br>±0.26 <sup>bc</sup>       | 0.371<br>±0.023 <sup>b</sup> | Herschel-Bulkley                         |                  | 5.6<br>±0.8                               | 0.866<br>±0.014 | 8.2<br>±1.1       |

a, b, c, d, f – mean values in columns denoted by different letters differ significantly ( $p \leq 0.05$ )

<sup>1</sup>C<sub>g</sub> – water dispersion of CPC<sub>g</sub>; C<sub>s</sub> – water dispersion of CPC<sub>s</sub>; C<sub>g</sub>T and C<sub>s</sub>T – C<sub>g</sub> and C<sub>s</sub> dispersions heated to 95°C; C<sub>g</sub>N and C<sub>s</sub>N – C<sub>g</sub> and C<sub>s</sub> dispersions with 0.1M NaCl; C<sub>g</sub>NT and C<sub>s</sub>NT – C<sub>g</sub> and C<sub>s</sub> dispersions with 0.1M NaCl heated to 95°C

<sup>§</sup>  $\mu$ 100 – viscosity at share rate = 100 s<sup>-1</sup>

<sup>†</sup> the decreasing rate index (VRI) of viscosity:  $VRI=1-(\mu_{100}/\mu_{10})$ , where  $\mu_{10}$  – viscosity at share rate = 10 s<sup>-1</sup>

<sup>‡</sup> model: Newton:  $\tau = \mu \cdot \dot{\gamma}$ ; Ostwald-de Waele:  $\tau = k \cdot \dot{\gamma}^n$ ; Herschel-Bulkley:  $\tau = \tau_0 + k \cdot \dot{\gamma}^n$ , where:  $\tau$  – shear stress,  $\mu$  – viscosity coefficient,  $\dot{\gamma}$  – shear rate,  $k$  – consistency index,  $n$  – flow index,  $\tau_0$  – yield stress;  $\tau_0 \geq 0$  and  $n < 1$  for a shear-thinning fluid, while for a Newtonian fluid  $\tau_0 = 0$  and  $n = 1$ .
